# Supplementary material for: Characterization and Comparison of the Divergent Metabolic Consequences of High-Sugar and High-Fat Diets in Male Wistar Rats
Source: Front Physiol. 2022 Jul 4;13:904366. doi: 10.3389/fphys.2022.904366 (PMC9290519; doi:10.3389/fphys.2022.904366)
Supplement: Supplementary file 1 [file Table2.XLSX]

## Sheet: Sheet1
PrimaryID	DietGroup	OGTT_10	OGTT_20	OGTT_30	OGTT_60	OGTT_90	OGTT_120	AUC
CON1-1	CON	6.7	5.8	5.4	5.6	6.1	6.7	233.9
CON1-2	CON	4.1	6.1	5.2	4.2	4.7	5	119.2
CON1-3	CON	(Animal died after gavage with sucrose solution)
CON1-4	CON	6.1	6.9	5.8	5.9	6.1	5.9	242.9
CON2-1	CON	6.8	5.8	5.9	4.8	4.8	5.1	154.7
CON2-2	CON	6.6	6.8	5.6	5.2	4.6	5.1	167.1
CON2-3	CON	6.8	6.6	6.2	5.8	5.3	5.6	222.1
CON2-4	CON	6.6	5.3	5.1	4.7	4.4	5.4	136.8
CON3-1	CON	6.9	6.9	6.7	4.6	5.3	5.7	207
CON3-2	CON	6.7	7.3	6.3	5.9	5.5	4.9	240.9
CON3-3	CON	7.6	7.8	6.9	6.7	5.5	5.7	294.6
CON3-4	CON	6.9	7.2	6.3	6.6	5.7	6.4	269.4
CON4-1	CON	6.2	6.8	5.7	5	4.6	4.7	156.8
CON4-2	CON	6.8	5.5	5.8	4.6	4.2	4.5	118.4
CON4-3	CON	5.9	5.9	5.9	4.8	5.1	4.6	130.9
CON4-4	CON	5.7	5.6	6.4	5	5	4.5	162
CON5-1	CON	6.1	6.1	6.4	5.5	5.4	5	183.7
CON5-2	CON	7.7	7.7	7.8	6.6	5.1	5.1	271.7
CON5-3	CON	6.9	6.4	5.6	4.4	5.1	4.7	150.3
CON5-4	CON	6.2	6.1	5.9	6	6.4	5.9	250.9
CON6-1	CON	8.1	7.1	6.4	6.1	5.5	5	254.3
CON6-2	CON	5.6	5.6	5.4	4.7	5.4	5	151.9
CON6-3	CON	7.2	6.6	6.2	4.7	5.6	5	203.7
CON6-4	CON	6.9	5.9	4.8	4.9	5	4.6	143
OB1-1-1	OB1	8.1	6.9	7.6	5.6	5.3	5.7	273.3
OB1-1-2	OB1	(Animal died after gavage with sucrose solution)
OB1-1-3	OB1	7.5	7.9	5.4	4.7	5.3	5.6	198.5
OB1-1-4	OB1	5.4	5.9	6.3	4.9	5.7	5.7	197.9
OB1-2-1	OB1	8.2	8.1	6.8	5.5	5.6	6.3	277.1
OB1-2-2	OB1	8.1	7.9	7.1	7.2	5.4	5.1	332
OB1-2-3	OB1	8.6	8.4	8.6	7.3	7.4	6.5	429.3
OB1-2-4	OB1	7.7	7.1	6.3	5.6	6.6	6.1	313.3
OB1-3-1	OB1	6.7	6.7	6.1	6.5	7.1	6.8	312.6
OB1-3-2	OB1	6.9	6.4	6.6	5.4	5	4.6	197.1
OB1-3-3	OB1	7.2	6.4	5.8	5.4	5.9	6.2	234.2
OB1-3-4	OB1	6.9	6.2	5.9	5.3	5.4	5.7	207.8
OB1-4-1	OB1	8.1	8.2	8	5.8	5.5	5.4	293.4
OB1-4-2	OB1	6.3	6.8	6.6	5.4	6.1	4.6	233.6
OB1-4-3	OB1	5.3	6.1	5.8	4.1	5.1	6.1	158
OB1-4-4	OB1	8	6.7	6.5	5.1	5.4	5.3	222
OB1-5-1	OB1	6.8	6.8	6.4	7.7	6.8	6.1	332.8
OB1-5-2	OB1	8.4	7.9	6.7	6.5	5.2	5.4	294.7
OB1-5-3	OB1	7.3	7.1	7.1	6.5	5.1	6	259.1
OB1-5-4	OB1			8.5	5.8	5.3	6.6	289
OB1-6-1	OB1	6.2	6.8	6.4	5.9	6.4	6.8	282.1
OB1-6-2	OB1	5.6	5.2	5.4	5.2	5.2	6.7	184.3
OB1-6-3	OB1	5.7	5.9	5.4	5.6	6.1	5	189.7
OB1-6-4	OB1	5.4	5.9	5.8	5.8	5.2	6.3	193.2
OB2-1-1	OB2	6.4	6.1	5.2	5.1	4.7	4.7	146.8
OB2-1-2	OB2	5.8	5.7	5.8	5.4	5.1	4.7	162.9
OB2-1-3	OB2	6.8	6.1	6.3	6.4	5.6	5.4	237.6
OB2-1-4	OB2	8.1	6.4	6.4	6.6	4.6	5.2	227.4
OB2-2-1	OB2	6.3	6.5	6.4	5.8	5.8	4.8	225.4
OB2-2-2	OB2	7.6	6.1	5.8	6.1	5.6	6.3	244.1
OB2-2-3	OB2	6.6	6.4	5.7	5.9	5.4	5.3	214.9
OB2-2-4	OB2	5.7	5.7	5.8	5.7	4.8	5.2	171.3
OB2-3-1	OB2	7.9	8.5	9.3	8.2	7.1	7.3	476.7
OB2-3-2	OB2	7.1	6.1	5.7	5	5.1	5	167.7
OB2-3-3	OB2	8.1	6.4	6.4	5.7	5.5	5.7	246.2
OB2-3-4	OB2	7.9	8.3	9.9	9.2	10.2	10.2	665.9
OB2-4-1	OB2	7.6	6.6	6.1	6.7	5.4	5.9	274.9
OB2-4-2	OB2	7.8	7.2	6.9	5.9	5.8	5.1	279.4
OB2-4-3	OB2	7.4	7.9	7.9	7.2	7.1	6.1	386.6
OB2-4-4	OB2	6.8	7.1	6.7	6.5	5.9	5.6	280.6
OB2-5-1	OB2	7.8	8.3	8.2	6.5	6.3	5.9	365
OB2-5-2	OB2	7.1	7.4	6.9	5.9	4.8	4.3	213.5
OB2-5-3	OB2	6.8	7.2	7.7	6.3	6.1	5.5	305.1
OB2-5-4	OB2	7.4	8.2	7.4	6.7	5.9	5.9	332
OB2-6-1	OB2	5.8	5.6	5.3	4.7	5.1	4.7	141.9
OB2-6-2	OB2	6.5	6.5	6.6	5.3	5.4	4.7	205.5
OB2-6-3	OB2	4.6	4.6	4.2	4.5	4.5	4.7	63.95
OB2-6-4	OB2	5.6	5.2	4.7	4.6	4	4	68.7
