# Supplementary material for: Characterization and Comparison of the Divergent Metabolic Consequences of High-Sugar and High-Fat Diets in Male Wistar Rats
Source: Front Physiol. 2022 Jul 4;13:904366. doi: 10.3389/fphys.2022.904366 (PMC9290519; doi:10.3389/fphys.2022.904366)
Supplement: Supplementary file 6 [file Table4.XLSX]

## Sheet: Sheet1
First author	pub year	Male Wistar	Female Wistar	Male SD	Female SD	young rats	food intake reported (g)	cal intake reported	feed efficiency ratio	isocaloric	mineral content reported	mineral intake reported	serum adiponectin	Body weights up	Visceral fat up	FBG up	Ins up	Adiponectin up	Adiponectin down	Trigs up	total cholesterol up	Leptin up	diet composition	product/intervention tested
Abdel-Satter	2018	1	0	0	0	1	0	0	0	0	0	0	1	1	1	1	1	0	1	1	1	1	0	1
Aborehab	2016	1	0	0	0	1	0	0	0	0	1	0	1	1	x	1	1	0	1	1	1	1	0	1
Al-Sawalha	2019	1	0	0	0	0	0	0	0	0	1	0	1	1	1	1	0	1	0	1	1	1	1	1
Ajiboye	2016	1	0	0	0	0	0	0	0	0	1	0	1	1	1	1	1	0	1	1	1	1	0	1
Amor	2019	0	0	1	0	0	1	1	0	0	0	0	1	1	1	0	1	0	0	1	1	1	0	1
Aslam	2017	1	0	0	0	1	0	0	0	0	0	0	1	1	1	1	1	1	0	x	0	x	0	0
Barragan-Zarate	2021	1	0	0	0	1	0	0	0	0	1	0	1	1	1	1	1	0	1	1	1	x	1	1
Boldarine	2021	0	1	0	0	0	0	0	1	0	0	0	1	1	1	0	0	0	0	0	0	0	0	1
Bunbupha	2020	0	0	1	0	0	0	0	0	0	0	0	1	1	1	1	1	0	1	1	1	x	0	1
Bunbupha	2021	0	0	1	0	0	0	0	0	0	0	0	1	1	1	1	1	0	1	1	1	x	0	1
Chacinska	2019	1	0	0	0	1	0	0	0	0	1	0	1	0	x	1	1	0	1	x	x	1	1	1
Cheng	2016	0	0	1	0	1	0	1	0	0	0	0	1	0	x	1	1	0	1	0	1	x	0	1
Das	2020	1	0	0	0	1	1	0	0	0	1	1	1	1	1	1	1	0	1	x	x	1	0	1
De las Heras	2017	1	0	0	0	0	1	0	0	0	1	1	1	1	x	0	1	0	0	1	1	1	1	1
El-Shazly	2018	1	0	0	0	0	1	0	0	0	1	1	1	1	1	1	1	0	1	1	1	1	1	1
El-Zeftawy	2020	0	0	0	1	1	1	0	0	0	0	0	1	1	1	1	1	0	1	1	1	1	0	1
Fakhoury-Sayegh	2019	1	0	0	0	1	1	1	0	1	1	1	1	0	0	0	0	0	0	0	x	x	1	0
Fallah	2017	1	0	0	0	0	1	0	0	0	1	1	1	1	x	1	1	1	0	1	0	x	1	1
Fiorino	2016	1	0	0	0	1	1	1	0	1	0	0	1	0	1	x	0	0	1	1	0	1	0	0
Gomaa	2019	1	0	0	0	0	0	0	0	0	0	0	1	1	1	1	1	0	1	1	1	1	0	1
Grasa-Lopez	2016	1	0	0	0	1	1	1	0	0	1	1	1	1	1	1	1	0	1	1	1	1	1	1
Grycel	2019	1	0	0	0	1	0	0	0	0	1	0	1	0	x	1	1	0	1	x	x	x	1	1
Gumede	2020	0	0	0	1	1	0	0	0	0	1	0	1	0	1	0	0	0	1	1	0	x	1	1
Han	2021	0	0	1	0	0	0	0	0	0	0	0	1	1	x	1	1	0	1	1	1	x	0	1
Heo	2018	0	0	1	0	1	0	0	0	0	1	0	1	1	1	0	1	0	1	0	1	1	1	1
Ibitoye	2018	1	0	0	0	1	0	0	0	0	1	0	1	1	1	1	1	0	1	1	1	1	0	1
Jambocus	2017	0	0	1	0	1	1	1	0	1	1	1	1	1	1	1	1	0	0	1	0	1	1	1
Jang	2017	0	0	1	0	0	1	0	1	0	1	1	1	1	1	0	1	0	1	x	1	x	1	1
Khaleel	2019	1	0	0	0	1	1	0	0	0	1	1	1	1	x	1	1	0	1	1	1	0	1	1
Kim	2021	0	0	1	0	1	1	0	0	0	0	0	1	1	1	1	1	0	1	1	1	1	0	1
Lavet	2016	1	0	0	0	1	1	1	0	1	1	1	1	1	1	0	1	1	0	0	0	1	1	0
Lenquiste	2019	1	0	0	0	0	1	1	1	1	1	1	1	1	1	1	1	0	1	x	0	0	1	1
Lima	2016	0	0	1	0	1	0	1	0	0	1	0	1	1	1	0	0	0	1	x	x	1	1	1
Mahmoudi	2018	1	0	0	0	0	1	1	0	0	0	0	1	1	1	x	0	0	1	1	1	x	0	1
Marques (Wistar)	2016	1	0	0	0	0	0	1	0	0	1	0	1	1	x	0	1	0	0	0	0	1	1	0
Marques (SD)	2016	0	0	1	0	0	0	1	0	0	1	0	1	1	x	0	0	0	0	0	0	1	1	0
Mazzoli	2020	0	0	1	0	0	0	1	0	0	1	0	1	1	1	1	1	0	1	x	x	x	1	0
Mehanna	2018	1	0	0	0	1	0	0	0	0	0	0	1	1	x	1	1	0	1	1	1	1	0	1
Mehrdoost	2021	0	0	1	0	0	0	0	0	0	1	0	1	1	x	1	1	0	1	1	1	x	0	1
Meriga	2017	0	0	1	0	1	1	0	0	0	0	0	1	1	1	1	1	0	1	1	1	1	0	1
Meriga pepironal	2017	0	0	1	0	1	0	0	0	0	1	0	1	1	1	1	1	0	1	1	1	1	1	1
Metwally	2019	0	1	0	0	1	0	0	0	0	1	0	1	1	1	1	1	0	1	0	1	1	0	1
Mohaqiq	2020	0	0	1	0	1	0	0	0	0	1	0	1	1	x	1	1	0	1	1	1	x	1	1
Moreno-Fernandez HF	2018	1	0	0	0	0	1	1	0	0	1	1	1	0	0	1	1	0	0	1	1	0	1	0
Moreno-Fernandez HFFr	2018	1	0	0	0	0	1	1	0	0	1	1	1	0	0	1	1	0	0	1	0	0	1	0
Moreno-Fernandez HFG	2018	1	0	0	0	0	1	1	0	0	1	1	1	1	1	1	1	1	0	1	0	0	1	0
Muhammad (male)	2021	0	0	1	0	1	1	1	0	0	0	0	1	0	1	0	0	0	0	1	1	x	0	1
Muhammad (female)	2021	0	0	0	1	1	1	1	0	0	0	0	1	1	1	0	0	0	0	1	1	x	0	1
Nour	2021	0	0	1	0	1	1	0	1	0	1	1	1	1	1	1	1	0	1	1	1	x	1	1
Ohashi	2021	1	0	0	0	1	0	0	0	0	1	0	1	0	x	0	1	0	1	1	1	x	0	1
Pascual-Serrano	2017	1	0	0	0	1	0	0	0	0	0	0	1	1	1	1	1	1	0	1	1	1	0	1
Prasatthong	2021	0	0	1	0	1	0	0	0	0	0	0	1	1	1	1	1	0	1	1	1	x	0	1
Pruszynska-Oszmalek	2021	1	0	0	0	1	0	0	0	0	1	0	1	1	x	1	1	0	0	1	1	1	1	0
Putakala	2017	1	0	0	0	1	0	0	0	0	1	0	1	1	x	1	1	0	1	1	1	1	0	1
Rahman	2017	0	0	1	0	1	1	1	0	0	1	1	1	1	1	x	1	0	1	1	0	1	1	1
Rameshreddy	2018	0	0	1	0	1	0	0	0	0	1	0	1	1	x	1	1	0	1	1	1	1	1	1
Ramos-Romero	2016	0	1	0	0	1	1	1	0	0	0	0	1	1	1	0	1	0	0	0	0	1	1	1
Rocha-Rodrigues	2018	0	0	1	0	1	0	0	1	1	1	0	1	0	1	0	0	0	1	x	x	0	1	1
Rubio-Ruiz	2019	1	0	0	0	1	0	0	0	0	1	0	1	1	1	0	1	1	0	1	0	1	1	1
Sanguesa glucose	2017	0	0	0	1	0	1	1	0	0	0	0	1	0	x	0	0	1	0	0	0	1	0	0
Sanguesa fructose	2017	0	0	0	1	0	1	1	0	0	0	0	1	1	x	0	1	0	0	1	0	1	0	0
Sarega	2016	0	0	1	0	0	0	0	0	0	0	0	1	1	x	1	1	0	1	x	x	0	1	1
Shao	2016	1	0	0	0	1	0	0	0	0	0	0	1	1	x	0	1	0	1	1	1	1	0	1
Tan	2021	0	0	1	0	1	0	0	0	0	0	0	1	1	1	1	1	0	1	1	1	x	0	1
Tanajak	2016	1	0	0	0	1	1	0	0	0	0	0	1	1	1	0	1	0	1	0	1	x	0	1
Tinkov	2017	1	0	0	0	1	0	0	0	0	1	0	1	0	1	0	0	0	0	0	0	1	0	0
Tinkov	2016	0	1	0	0	0	0	0	0	0	0	0	1	0	1	1	0	0	0	0	0	1	0	0
Vide	2018	1	0	0	0	1	1	1	0	0	1	1	1	1	1	0	0	0	0	0	0	1	1	1
Virto	2018	1	0	0	0	1	1	1	1	0	1	1	1	1	1	0	0	0	0	0	1	1	1	1
Wei	2019	0	0	1	0	1	0	0	0	0	0	0	1	1	x	1	1	0	1	1	1	x	0	1
Wen	2019	0	0	1	0	1	0	0	0	0	0	0	1	1	x	0	0	0	1	1	1	0	0	1
Wong	2018	1	0	0	0	0	0	1	0	1	0	0	1	0	1	1	1	0	1	1	1	1	0	1
Wu	2016	1	0	0	0	0	1	0	0	0	0	0	1	1	x	0	1	0	0	x	x	x	0	1
Zayed	2018	0	0	1	0	0	0	0	0	0	0	0	1	1	1	1	1	0	0	1	1	x	0	1
Zhang	2016	0	0	1	0	0	1	1	0	1	1	1	1	1	1	1	1	0	1	1	1	1	1	1
Zhang	2018	0	0	1	0	0	1	1	0	0	1	1	1	1	1	1	1	0	1	1	1	1	1	1
Zhao	2017	1	0	0	0	1	1	1	0	0	0	0	1	1	1	x	1	0	1	1	1		1	1
		39	4	29	5	47	34	28	6	8	44	20	77	62	50	47	60	8	49	51	48	42	34	62
Table key: 1 = yes, 0 = no, x = not measured
Sub-selection of articles with isocaloric food intake between diet groups:
First author	pub year	Male Wistar	Female Wistar	Male SD	Female SD	young rats	food intake reported (g)	cal intake reported	feed efficiency ratio	isocaloric	mineral content reported	mineral intake reported	serum adiponectin	Body weights up	Visceral fat up	FBG up	Ins up	Adiponectin up	Adiponectin down	Trigs up	total cholesterol up	Leptin up	diet composition
Fakhoury-Sayegh	2019	1	0	0	0	1	1	1	0	1	1	1	1	0	0	0	0	0	0	0	x	x	1
Fiorino	2016	1	0	0	0	1	1	1	0	1	0	0	1	0	1	x	0	0	1	1	0	1	0
Jambocus	2017	0	0	1	0	1	1	1	0	1	1	1	1	1	1	1	1	0	0	1	0	1	1
Lavet	2016	1	0	0	0	1	1	1	0	1	1	1	1	1	1	0	1	1	0	0	0	1	1
Lenquiste	2019	1	0	0	0	0	1	1	1	1	1	1	1	1	1	1	1	0	1	x	0	0	1
Rocha-Rodrigues	2018	0	0	1	0	1	0	0	1	1	1	0	1	0	1	0	0	0	1	x	x	0	1
Wong	2018	1	0	0	0	0	0	1	0	1	0	0	1	0	1	1	1	0	1	1	1	1	1
		5	0	2	0	5	5	6	2	7	5	4	7	3	6	3	4	1	4	3	1	4	6
		88
